# Supplementary material for: Synthesis and application of hollow magnetic graphitic carbon microspheres with/without TiO2 nanoparticle layer on the surface
Source: Royal Society of Chemistry journal article supplement (doi:10.1039/c0cc01498b), 2010-01-01
Supplement: c0cc01498b.pdf [file c0cc01498b.pdf]

## Electronic Supplementary Information

### Synthesis and Application of Hollow Magnetic Graphitic Carbon Microspheres with/without TiO<sub>2</sub> Nanoparticle Layer on the Surface

*Shanshan Feng<sup>a</sup>, Zhiyu Ren<sup>a</sup>, Yuanlong Wei<sup>b</sup>, Baojiang Jiang<sup>a</sup>, Yang Liu<sup>a</sup>, Lingyi Zhang<sup>b</sup>,  
Weibing Zhang<sup>b</sup> and Honggang Fu<sup>a\*</sup>*

<sup>a</sup> Key Laboratory of Functional Inorganic Material Chemistry, Ministry of Education of the People's Republic of China, Heilongjiang University, Harbin 150080 P. R. China

<sup>b</sup> School of Chemistry and Molecular Engineering, East China University of Science and Technology, Shanghai 200237 P. R. China

Corresponding author E-mail: [fuhg@vip.sina.com](mailto:fuhg@vip.sina.com),

Tel.: +86 451 8660 8458,

Fax: +86 451 8667 3647

## Experimental

### 1. Synthesis of hollow magnetic graphitic carbon microspheres (HMGS)

0.8 g of  $\beta$ -CD was dissolved in 48 mL of H<sub>2</sub>O with stirring, and then 4.8 mL of aqueous solution containing Fe<sub>3</sub>O<sub>4</sub> NPs stabilized by OA and ammonia (10 g L<sup>-1</sup>) were added.<sup>1</sup> The resulting solution was transferred into a Teflon-lined stainless autoclave and was kept in oven at 160 °C, 170 °C, 175 °C, 180 °C and 190 °C for 24 h, respectively. After cooling down naturally, the final products washed thoroughly with deionized water and ethanol. The HMCSs were obtained. For further carbonization, as-prepared HMCSs were calcined under high-purity nitrogen stream at 700 °C for 2 h with a temperature ramp of 10 °C min<sup>-1</sup>.

### 2. Synthesis of HMGS@TiO<sub>2</sub> microspheres

8.5 mL of tetrabutyltitanate (TBT) was dissolved in 40 mL of mixture solution containing ethanol and ethanolamine under stirring, followed by dropwise addition of a mixture solution of water and ethanol (1:5, v/v). After stirring for 2 h, 100 mg of as-prepared HMCSs were dispersed in the above solution. The HMCSs decorated with TBT were separated and washed with ethanol. After dried in vacuum, the obtained powder was calcined under high-purity nitrogen stream at 700 °C for 2 h with a temperature ramp of 10 °C min<sup>-1</sup>.

### 3. Enrichment of Phosphopeptides by HMGS@TiO<sub>2</sub> microspheres

In brief, a suspension of HMGS@TiO<sub>2</sub> microspheres (20 mg mL<sup>-1</sup>) was prepared by dispersing in 50% ACN and 0.1% TFA aqueous solution (v/v). After incubation for 30 min, 5  $\mu$ L of the suspension was added into peptide mixture (200  $\mu$ L, 1 $\times$ 10<sup>-7</sup> mol L<sup>-1</sup>) originating from tryptic digestions, and the mixed solutions were vibrated for 30 s. After that, with the help of magnet, the peptides-HMGS@TiO<sub>2</sub> microspheres were collected by removal of the supernatant and rinsed with 50% ACN and 0.1% TFA aqueous solution (v/v) for two times. Then, the obtained peptide-loaded HMGS@TiO<sub>2</sub> microspheres were re-dispersed in 10  $\mu$ L of 50% ACN aqueous solution (v/v).

## Characterization

SEM images and EDX spectrum were recorded with a Hitachi S-4800 field emission scanning electron microscope. TEM images were taken with a JEM-3010 electron microscope (JEOL, Japan). FT-IR spectra were recorded on a Nicolet IS10. XRD pattern was performed on Rigaku D/max-IIIB. XPS spectrum was recorded with PHI 5700. Raman spectra were performed on a Jobin Yvon HR 800 micro-Raman spectrometer at 457.9 nm. Hysteresis loop of the sample was obtained using a vibrating sample magnetometer (VSM) (model 730, Lakeshore). The heavy metal ions concentration was measured by atomic absorption spectrometry (AAS, Thermo Elemental SOLAAR-M). The MALDI-TOFMS analyses were performed in positive ion mode on Voyager-DE STR mass spectrometer (Applied Biosystems, Framingham, MA, USA)

## Results and discussion

### 1 Fe<sub>3</sub>O<sub>4</sub> nanoparticles (NPs) stabilized by oil acid (OA) and ammonia

Pure phase Fe<sub>3</sub>O<sub>4</sub> NPs were prepared by coprecipitation (as shown in Fig. S1),<sup>1</sup> which were further stabilized by OA and ammonia. The position of the XRD peaks at  $2\theta = 30.2^\circ$ ,  $35.3^\circ$ ,  $43.2^\circ$ ,  $57.5^\circ$  and  $62.9^\circ$  are ascribed to the diffraction of the face-centered cubic (fcc) structure of Fe<sub>3</sub>O<sub>4</sub> respectively.

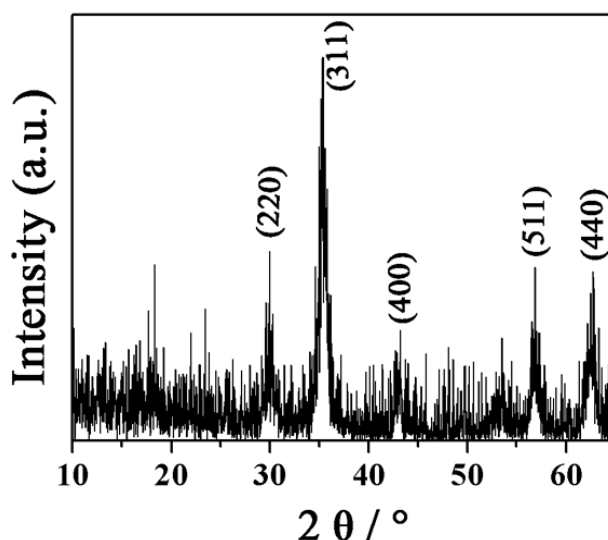

**Fig. S1** XRD spectra of the as-prepared Fe<sub>3</sub>O<sub>4</sub> NPs.

The FT-IR spectra of OA (a), Fe<sub>3</sub>O<sub>4</sub> NPs modified by OA (b) and Fe<sub>3</sub>O<sub>4</sub> NPs stabilized by OA and ammonia (c) are presented in Fig. S2. The assignment of the characteristic FT-IR absorption bands are summarized in Table S1. Compared the FT-IR spectra of Fe<sub>3</sub>O<sub>4</sub> NPs modified by OA with that of OA, a new absorption peak at 1585 cm<sup>-1</sup> corresponds to the free -COO<sup>-</sup> group, implying that the existence of free OA. Meanwhile, the characteristic absorption peak of Fe-O bond at 571 cm<sup>-1</sup> can be observed indicating that the presence of Fe<sub>3</sub>O<sub>4</sub> NPs. When ammonia is introduced to this system, significant changes appear in the FT-IR spectra. Accompanied with the disappearance of absorption peak of OA dimer at 1710 cm<sup>-1</sup> ( $\nu$  (C=O)), a stronger and broader absorption band at 1623 cm<sup>-1</sup> exhibit in the FT-IR spectra of Fe<sub>3</sub>O<sub>4</sub> NPs stabilized by OA and ammonia, which involves the absorption bands of  $\nu_{as}$  (NH<sub>4</sub><sup>+</sup>),  $\nu_s$  (C-H) and the free -COO<sup>-</sup> group. The strong peak at 1384 cm<sup>-1</sup> is attributed to the composite absorptions of N-O bonds and  $\delta_s$  (-CH<sub>3</sub>). Moreover, the absorption band from 3500-2800 cm<sup>-1</sup> is broadened due to the composite of  $\nu$  (N-H),  $\nu$  (C-H) and  $\nu$  (O-H). The results imply that Fe<sub>3</sub>O<sub>4</sub> NPs are stabilized by OA and ammonia.

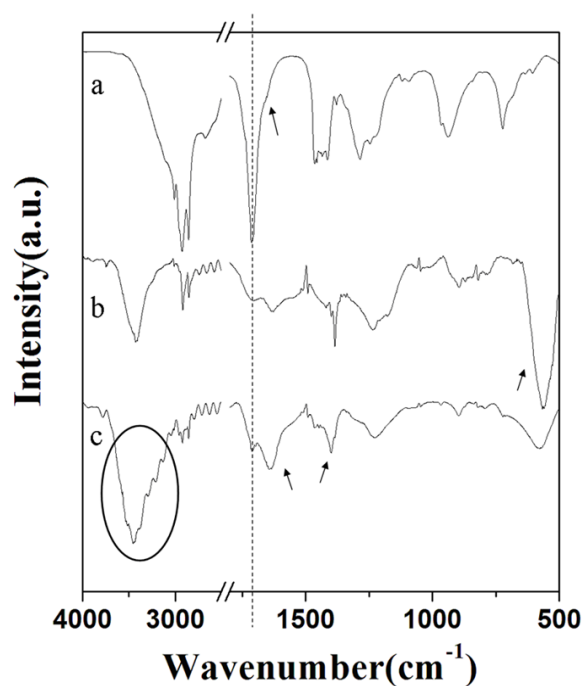

**Fig. S2** FT-IR spectra of a) pure OA; b) Fe<sub>3</sub>O<sub>4</sub> NPs modified by OA; c) Fe<sub>3</sub>O<sub>4</sub> NPs stabilized by OA and ammonia.

**Table S1.** Assignment of FT-IR spectra of a) pure OA; b) Fe<sub>3</sub>O<sub>4</sub> NPs modified by OA; c) Fe<sub>3</sub>O<sub>4</sub> NPs stabilized by OA and ammonia (presented in Fig. S2).

| samples | IR absorption bands/cm <sup>-1</sup> | description                                               |
|---------|--------------------------------------|-----------------------------------------------------------|
| a       | 3009                                 | $\nu$ (=C-H)                                              |
|         | 2924, 2855                           | $\nu_{as}$ (CH <sub>2</sub> ), $\nu_s$ (CH <sub>2</sub> ) |
|         | 1713                                 | $\nu$ (C=O) : dimer of OA                                 |
|         | 1285                                 | $\nu$ (C-O), $\nu$ (C-H)                                  |
| b       | 3650-3200                            | $\nu$ (O-H),                                              |
|         | 571                                  | absorption bands of the Fe-O bond                         |
| c       | 3500-2800                            | $\nu$ (N-H), $\nu$ (C-H), $\nu$ (O-H)                     |
|         | 1623                                 | $\nu_{as}$ (NH <sub>4</sub> <sup>+</sup> ), $\nu_s$ (C-H) |
|         | 1384                                 | N-O and $\delta_s$ (-CH <sub>3</sub> )                    |

$\nu_s$ , symmetric stretching vibration;  $\nu_{as}$ , asymmetric stretching vibration;  $\delta$ , bending vibration

## 2 Fe<sub>3</sub>O<sub>4</sub> NPs modified by $\beta$ -cyclodextrins (Fe<sub>3</sub>O<sub>4</sub>/ $\beta$ -CD)

Compared the FT-IR spectra of Fe<sub>3</sub>O<sub>4</sub>/ $\beta$ -CD with that of Fe<sub>3</sub>O<sub>4</sub> NPs stabilized by OA and ammonia, a series of characteristic absorption bands of  $\beta$ -CD appear in the spectra of Fe<sub>3</sub>O<sub>4</sub>/ $\beta$ -CD. The bands (1025-1157 cm<sup>-1</sup>) assigned to the antisymmetric glycosidic vibrations of  $\nu_a$  (C-O-C) and the coupled  $\nu$  (C-C/CO) stretch vibration.<sup>2, 3</sup> The peaks in the range of 1299-1460 cm<sup>-1</sup> attributed to the composite of the deformation vibrations of  $\sigma$  (C-H) and  $\sigma$  (O-H) of the CH<sub>2</sub> and OH groups. Meanwhile, the characteristic peak of the ring vibrations at 945 cm<sup>-1</sup> also appears. These results provide strong evidence for the presence of the  $\beta$ -CD around the Fe<sub>3</sub>O<sub>4</sub> NPs.

In addition, the difference between Fe<sub>3</sub>O<sub>4</sub>/ $\beta$ -CD and pure  $\beta$ -CD can also be observed in the IR spectra. The peak of Fe<sub>3</sub>O<sub>4</sub>/ $\beta$ -CD at 2930 cm<sup>-1</sup> ( $\nu_a$  (CH<sub>2</sub>)) is shifted by ~9 cm<sup>-1</sup> compared to that in Fe<sub>3</sub>O<sub>4</sub> NPs stabilized by OA and ammonia (2921 cm<sup>-1</sup>). The coupled  $\nu$  (C-C/C-O) stretch vibration band in sample of Fe<sub>3</sub>O<sub>4</sub>/ $\beta$ -CD appears at 1029 cm<sup>-1</sup>, which is blue-shifted by ~5 cm<sup>-1</sup> compared with the peak of pure  $\beta$ -CD. These results suggest that  $\beta$ -CD may interact with OA.

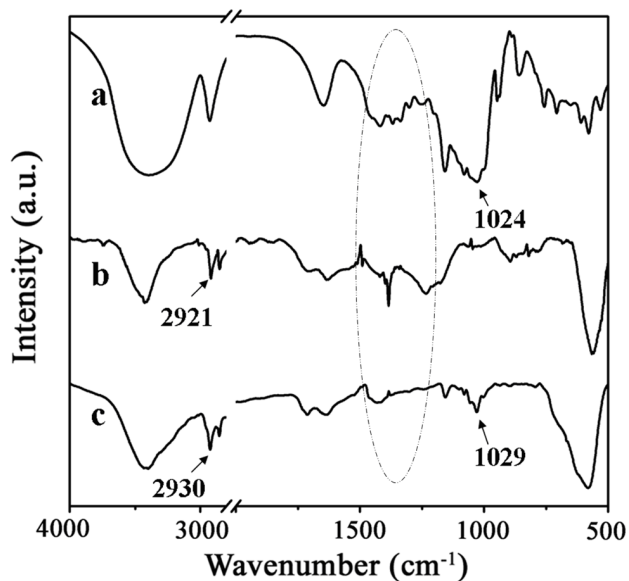

**Fig. S3** FT-IR spectra of a) pure  $\beta$ -CD; b) Fe<sub>3</sub>O<sub>4</sub> NPs stabilized by OA and ammonia; c) Fe<sub>3</sub>O<sub>4</sub>/ $\beta$ -CD.

### 3 Structural characteristic of HMCSs and HMGSs

#### 3.1 The effect of hydrothermal temperature on the structure of HMCSs

The effect of hydrothermal temperature on the structure of HMCSs was studied as shown in Fig. S4. Obviously, HMCSs cannot form until the hydrothermal temperature reaches 170 °C. During the hydrothermal reaction, the hydrolyzation, dehydration and carbonization reactions of  $\beta$ -CD occur. If the hydrothermal temperature is not high enough to cause the carbonization (below 170 °C), only the compound of carbon and Fe<sub>3</sub>O<sub>4</sub> NPs can be obtained (as shown in Fig. S4A and Fig. S4E). When the hydrothermal temperature meets or exceeds the temperature of carbonization (in the range of 170 °C-180 °C), Fe<sub>3</sub>O<sub>4</sub>/ $\beta$ -CD and  $\beta$ -CD assemble around the bubbles of NH<sub>3</sub> and be carbonized to form HMCSs. However, it is difficult to control the sizes of cavities and carbon microspheres due to the random sizes of bubbles in the system. However, further increasing the hydrothermal temperature to 190 °C, lots of solid carbon microspheres besides HMCSs with small hollow cavities emerge. Maybe, the formation of lots of solid carbon microspheres results from the violent and fast reactions of Fe<sub>3</sub>O<sub>4</sub>/ $\beta$ -CD and  $\beta$ -CD under the higher hydrothermal temperature. The reactions of

hydrolyzation, dehydration and carbonization of  $\beta$ -CD have started before the aggregation and assembly of  $\text{Fe}_3\text{O}_4/\beta$ -CD and  $\beta$ -CD around bubbles occur.

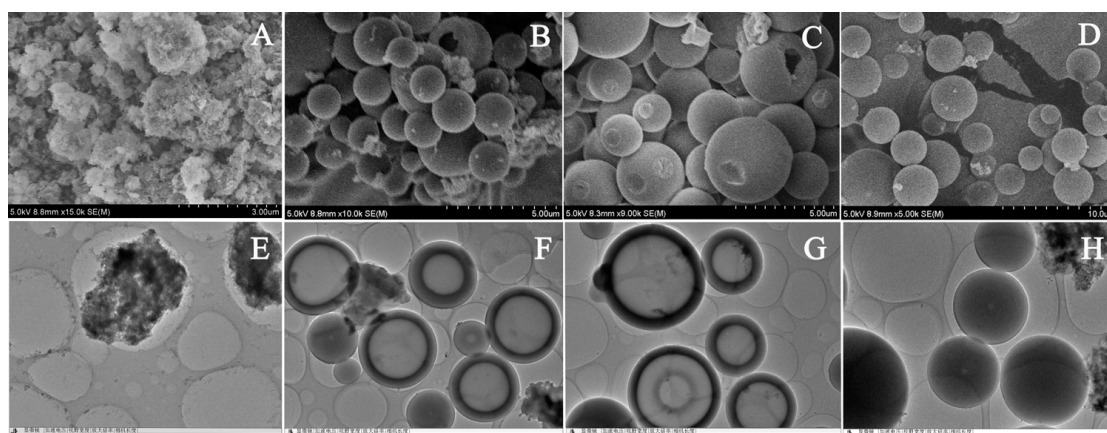

**Fig. S4** Typical SEM and TEM images of HMCSs synthesized at different hydrothermal temperatures for 24 h: A, E) 160 °C; B, F) 170 °C; C, G) 180 °C and D, H) 190 °C.

### 3.2 Structural characteristic of HMCSs and HMGs

The bands at  $1700\text{ cm}^{-1}$  and  $1620\text{ cm}^{-1}$  attribute to  $\text{C}=\text{O}$  and  $\text{C}=\text{C}$  vibrations, respectively, which attest the carbonization and aromatization during the hydrothermal treatment.<sup>4-6</sup> The bands at  $3390\text{ cm}^{-1}$  implies the existence of large numbers of residual hydroxyl groups, implying that it is possible for the loading of other functional molecules to widen applications. Whereas, it is noteworthy that the bands at  $575\text{ cm}^{-1}$  exhibit in the FT-IR spectra of as-prepared HMCSs, which attribute to the absorptions band of  $\text{Fe}-\text{O}$  bond of the  $\text{Fe}_3\text{O}_4$  NPs.<sup>7</sup> The result implies that the assembly under hydrothermal condition involves not only  $\beta$ -cyclodextrin ( $\beta$ -CD) but also  $\text{Fe}_3\text{O}_4$  NPs modified by  $\beta$ -CD ( $\text{Fe}_3\text{O}_4/\beta$ -CD), which is consistent with our prediction.

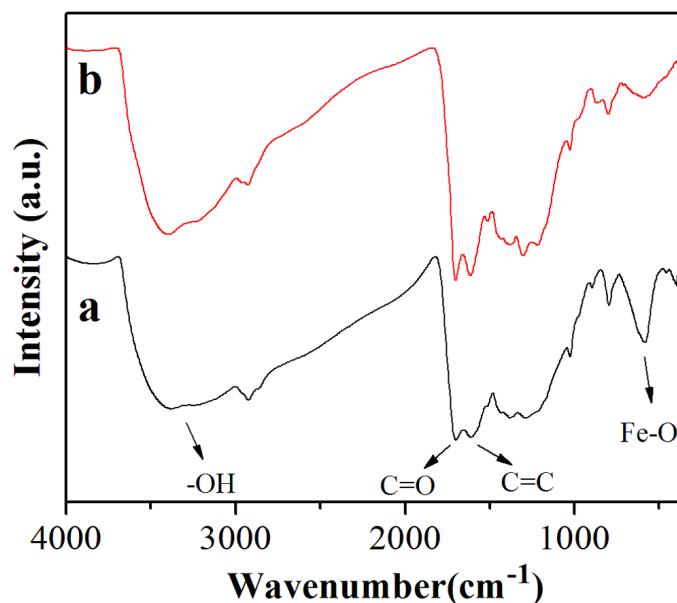

**Fig. S5** FT-IR spectra of a) HMCSs prepared by synchronous hydrothermal reaction of  $\beta$ -CD and  $\text{Fe}_3\text{O}_4/\beta$ -CD; b) pure  $\beta$ -CD.

Herein, to study the pathways for the formation of the graphitic carbon in detail, HMCSs after carbonization at different temperatures were measured by XRD (shown in Fig. S6). From the patterns of XRD, it can be seen that no obvious diffraction peaks of graphite are observed until the temperature reached 700 °C. Two peaks of XRD pattern at  $2\theta = 26.26^\circ$  and  $44.38^\circ$  can be clearly observed, which can be indexed as graphitic (002) and (101) planes, respectively, implying that the conversion of carbon structure from the amorphous carbon to the highly crystallized graphite takes place. The results may be attributed to the appearance of  $\text{Fe}_2\text{O}_3$  (at 650 °C). With the temperature of carbonization increasing, lots of carbon dioxide produces due to the decomposition of organic molecule, which could use as the oxidant to cause the formation of  $\text{Fe}_2\text{O}_3$  attaching to the surface of  $\text{Fe}_3\text{O}_4$  NPs. The produced  $\text{Fe}_2\text{O}_3$  possess catalyze effect to cause the graphitization of amorphous carbon around  $\text{Fe}_2\text{O}_3$ . In contrast, the carbon located far from  $\text{Fe}_2\text{O}_3$  is not graphitized resulting in the weak diffraction peaks of graphite.



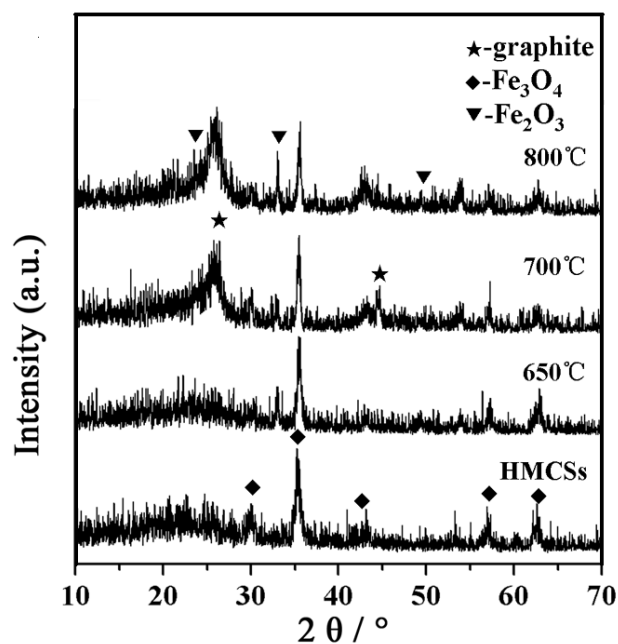

**Fig. S6** XRD patterns of HMGSs at different carbonization temperatures.

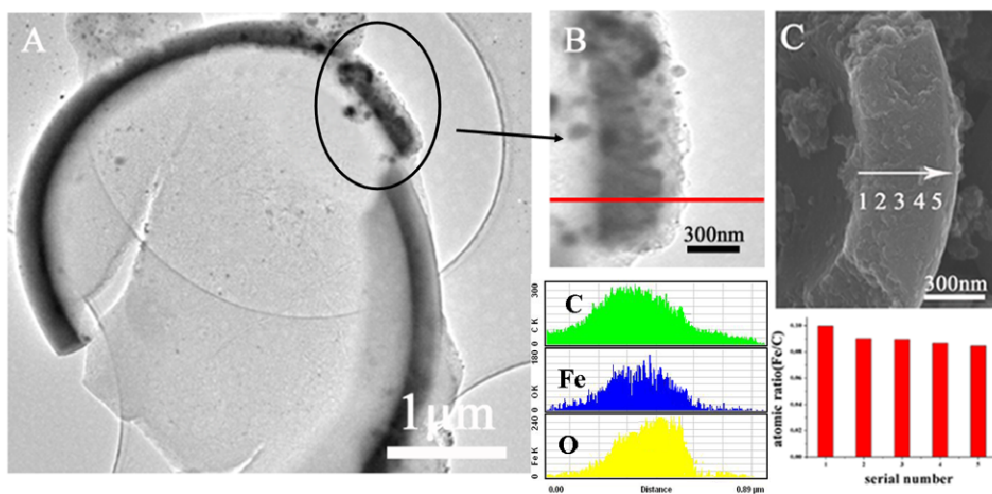

**Fig. S7** A) and B) TEM image of trituated HMCSs, and linear scan analysis from the TEM image demonstrating distributing of C, O and Fe elements; C) Typical SEM of trituated HMGSs, and atomic ratio of Fe/C pattern along the arrow.

To further validate the distribution of  $\text{Fe}_3\text{O}_4$  NPs in HMCSs, XPS spectra of HMCSs were measured. Considering the tiny difference in the atomic ratio of Fe/C, the XPS spectra of the original HMCSs and the trituated HMCSs were measured in experiments, respectively. The concentration of C, O and Fe element were analyzed via the intensity of the peaks (as shown in Fig. S8). The concentration of Fe and O element measured from the trituated HMCSs is a

little higher than that measured from the HMGSs. In contrast, the concentration of C element of the triturated sample decrease compared with that of the original HMCSs. Such result accords with the linear scan analysis from the TEM and SEM images.

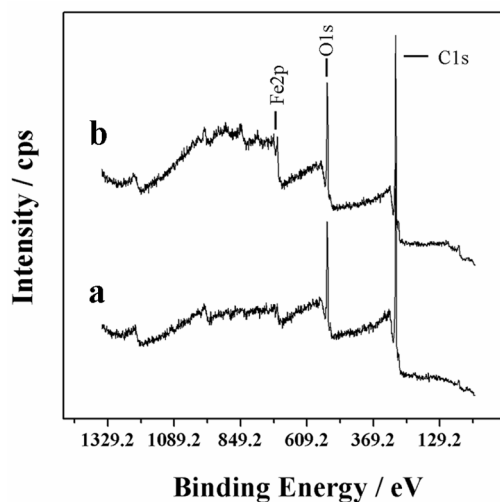

|                     | Element | Area<br>(cts-eV/s) | Sensitivity<br>Factor | Concentration<br>(%) |
|---------------------|---------|--------------------|-----------------------|----------------------|
| HMCSs               | C1s     | 6317               | 6.994                 | 76.38                |
|                     | O1s     | 4499               | 17.428                | 21.83                |
|                     | Fe2p    | 1557               | 73.679                | 1.79                 |
| triturated<br>HMCSs | C1s     | 5656               | 6.994                 | 71.55                |
|                     | O1s     | 4752               | 17.428                | 24.12                |
|                     | Fe2p    | 3600               | 73.679                | 4.32                 |

**Fig. S8** XPS spectra of the whole HMGSs (a) and the triturated HMGSs (b); and the analysis of the concentration of C, O and Fe element.

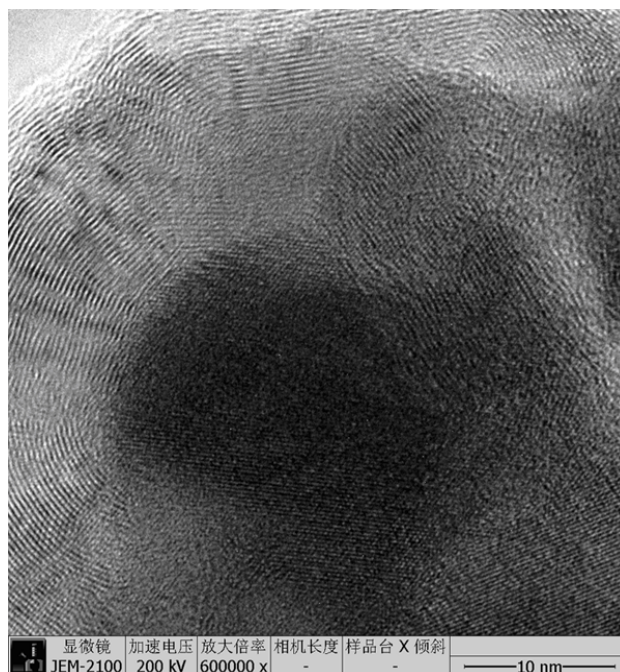

**Fig. S9** HRTEM images of HMGSs (the original image of Fig. 1F).

The graphitic carbon structure is also evident in the Raman spectra shown in Fig. S10. Compared with the Raman spectra of HMCSs, the G band at  $1587\text{ cm}^{-1}$  arising from in-plane stretching is noticeably sharper and the broad multi-band peaks around  $2700\text{ cm}^{-1}$  (2D) are appear, which are consistent with the multi-layer feature of graphite.<sup>8</sup> The strong D band speak at  $1341\text{ cm}^{-1}$  can also be observed, which maybe is attributed to the vibration mode of carbon atoms with dangling bonds at the edges of graphite defects and the presence of amorphous carbon in HMGSs.

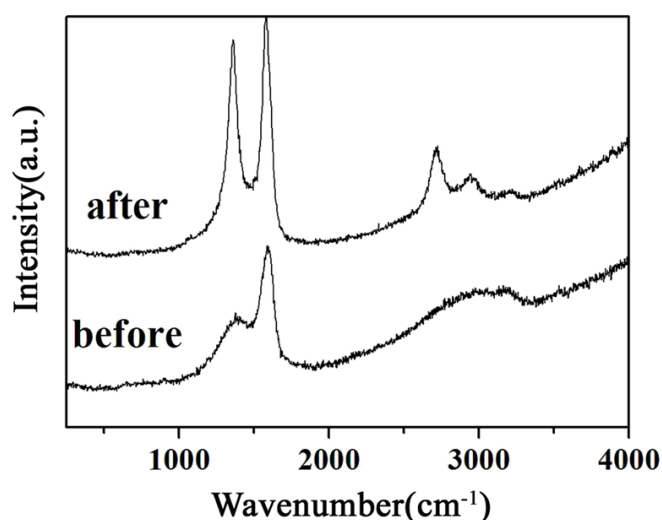

**Fig. S10** Raman spectra of HMCSs before and after calcination.

## 4 Formation mechanisms of HMCSs

### 4.1 Effect of ammonia on the formation of HMCSs

In experiment, TG coupled with a FT-IR (TG/FT-IR) technique was used to certify the liberation of  $\text{NH}_3$  gas from  $\text{Fe}_3\text{O}_4$  NPs stabilized by OA and ammonia. Compared with standardized spectra of  $\text{NH}_3$  gas and water vapour, the evolution of the IR spectra in the region  $3400\text{--}3200\text{ cm}^{-1}$  and  $1200\text{--}800\text{ cm}^{-1}$  display that  $\text{NH}_3$  gas release gradually with increasing temperature. Moreover, it is noteworthy that the hydrothermal reaction is a close system in which the released  $\text{NH}_3$  gas can re-dissolve to form bubble-template.

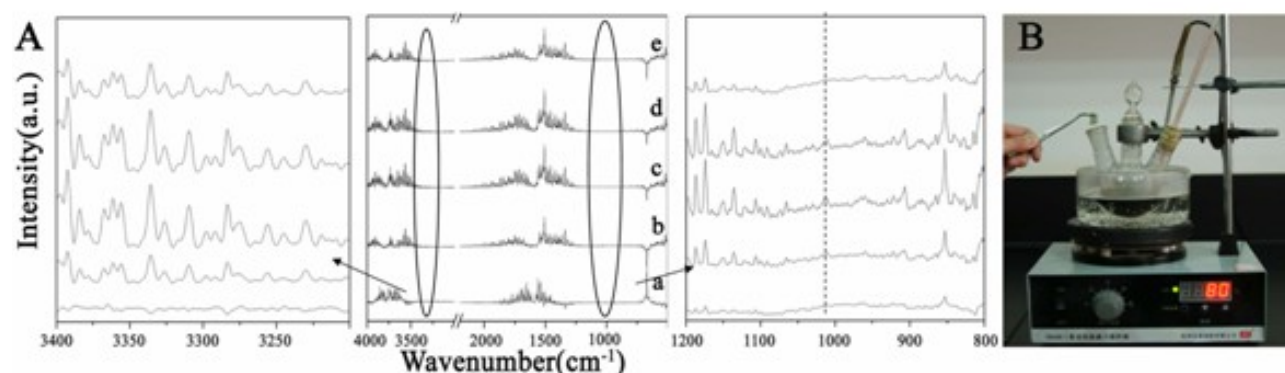

**Fig. S11** A) Evolution with the temperature of the FT-IR spectra of the gases evolved in the thermal pyrolysis of  $\text{Fe}_3\text{O}_4$  NPs stabilized by OA and ammonia: a-e) 55 °C, 80 °C, 140 °C, 155 °C and 180 °C, respectively; B) the picture of  $\text{NH}_3$  gas released from  $\text{Fe}_3\text{O}_4$  NPs stabilized by OA and ammonia.

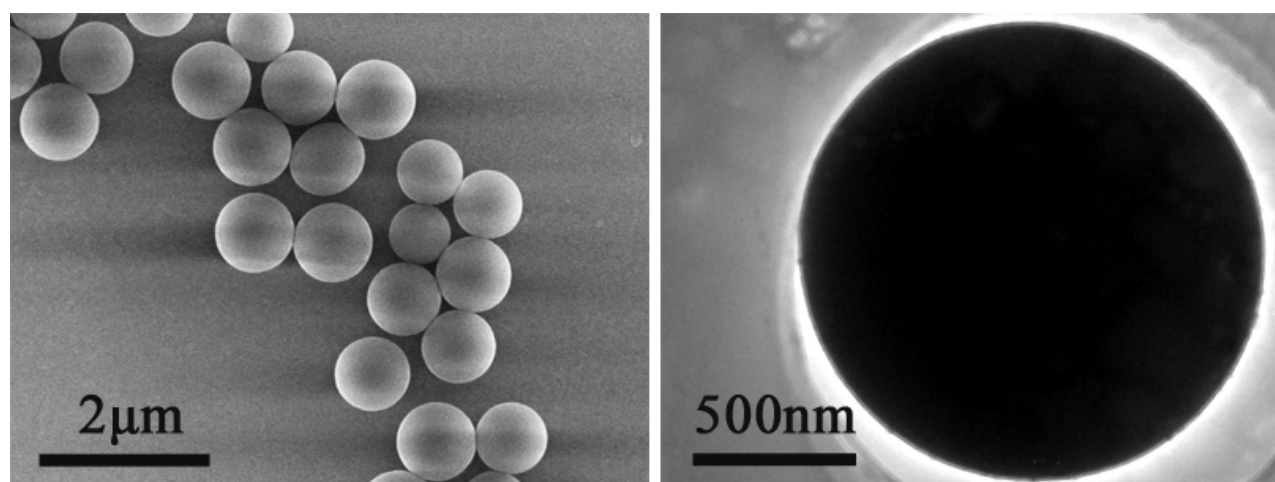

**Fig. S12** Typical SEM and TEM images of microspheres prepared without ammonia.

## 4.2 Effect of OA on the formation of HMGSs

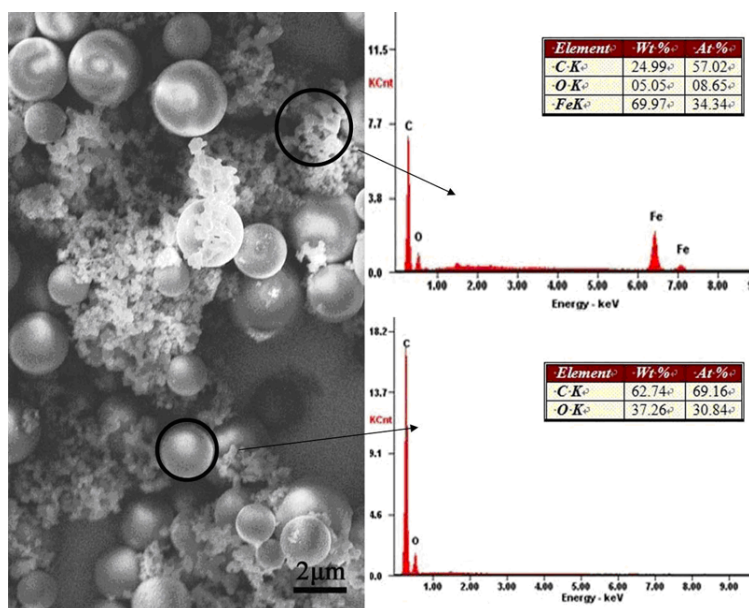

**Fig. S13** Typical SEM image of microspheres prepared without OA; EDX spectra show the chemical composition of the areas labeled by the black circles, respectively.

## 5 Magnetics and adsorption properties of HMGSs

In fact, it is undeniable that carbon shell could weaken the magnetic response of HMGSs as shown in the field-dependent magnetization curve (Fig. S14). The magnetization saturation ( $M_s$ ) value is about  $22.34 \text{ emu g}^{-1}$ . Taking into account that the sample contains 49.7 wt%  $\text{Fe}_3\text{O}_4$ , it gives a value of  $44.95 \text{ emu g}^{-1}$ , which is much lower than that of similarly sized NPs prepared by other methods ( $85 \text{ emu g}^{-1}$ ).<sup>9</sup> The low magnetization saturation ( $M_s$ ) value and a small hysteresis loop appear, suggesting that HMGSs have ferromagnetic behavior. These are maybe attribute to the surface spin canting effects and the surfactant coating reducing the total magnetic moment of the  $\text{Fe}_3\text{O}_4$  NPs,<sup>10, 11</sup> and conversion of part of  $\text{Fe}_3\text{O}_4$  to  $\text{Fe}_2\text{O}_3$  during high temperature carbonization. In experiment, however, HMGSs floating on the surface of water still could be fast separated under an external magnetic field and can be readily re-dispersed in water by stirring or sonication due to the low coercive force (about 216 Oe), implying the promising application in the treatment of pollutant on the surface of water with the magnetic-assist separation.

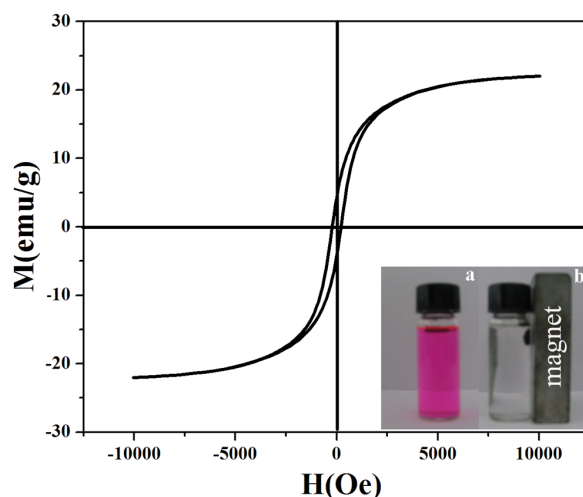

**Fig. S14** Magnetization curve measured at 300 K for HMGSs (inset: magnetic-assisted separation of HMGSs after adsorbing RhB).

The HMGSs (~50 mg) were dispersed and sonicated in 10 mg L<sup>-1</sup> aqueous Cu<sup>2+</sup>, Cd<sup>2+</sup>, As<sup>3+</sup>, Ag<sup>+</sup> and Au<sup>3+</sup> ions for 4 h, respectively. The adsorption capacities Q (mg g<sup>-1</sup>) were obtained as follows:  $Q = [(C_1 - C_2)V]/m$ ; where C<sub>1</sub> and C<sub>2</sub> denote the initial and final concentrations (mg g<sup>-1</sup>) of metal ion in the aqueous solution, respectively, V is the volume of metal ion solution and m is the weight of the adsorbent.<sup>12</sup>

**Table S2** Adsorption capacity of HMGSs for metal ions.

| Metal ions                                | Cu <sup>2+</sup> | Cd <sup>2+</sup> | Ag <sup>+</sup> | Au <sup>3+</sup> | As <sup>3+</sup> |
|-------------------------------------------|------------------|------------------|-----------------|------------------|------------------|
| Adsorption capacity (mg g <sup>-1</sup> ) | 1.4564           | 1.4062           | 1.2036          | 1.762            | 2.2112           |

## 6 Synthesis and application of HMGS@TiO<sub>2</sub>

Due to the moderate synthesis conditions, the compact TiO<sub>2</sub> NP layer about 10-20 nm rather than a TiO<sub>2</sub> film disperse uniformly on the surface of HMGSs, resulting in slightly increasing of the surface roughness (shown in Fig. S15). Meanwhile, energy dispersive X-ray analysis of the obtained spheres reveals the existence of C, Ti, and O elements. The lattice fringes corresponding to (101) ( $d_{101} = 0.35$  nm) crystallographical planes of anatase TiO<sub>2</sub> are clearly observed in HRTEM (Fig. S15C and Fig. S15D).

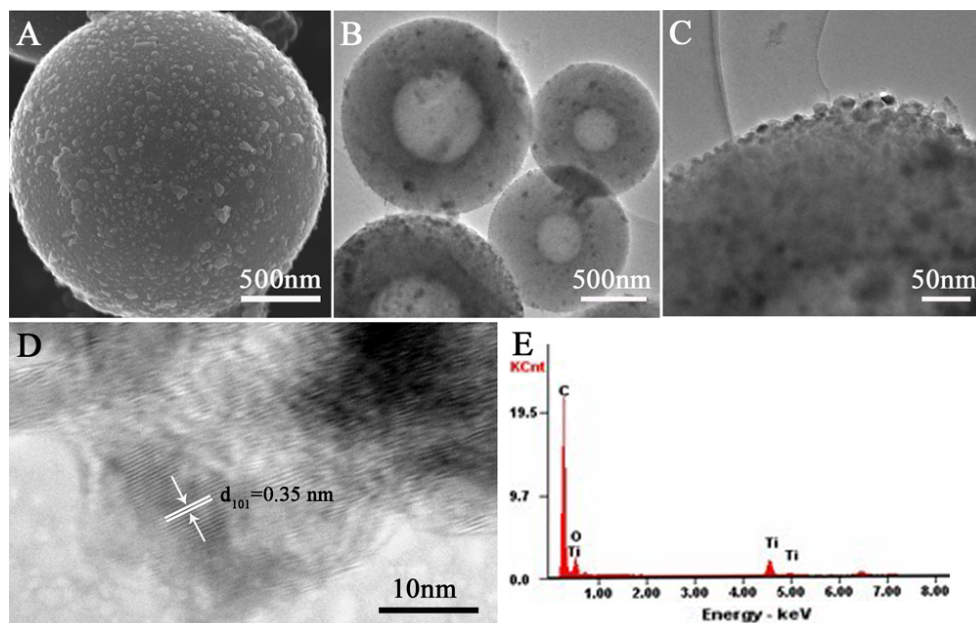

**Fig. S15** Typical SEM (A), TEM images (B and C) and EDX spectra (E) of HMGS@TiO<sub>2</sub> microspheres, (D) HRTEM images of TiO<sub>2</sub> NPs.

**Table S3** Phosphopeptides ion peaks observed in the MALDI mass spectrum of tryptic digests of  $\alpha$ -casein and  $\beta$ -casein.

| NO.         | phosphopeptide sequences              | Number of phosphorylation sites | [M+H] <sup>+</sup> |
|-------------|---------------------------------------|---------------------------------|--------------------|
| $\beta$ 1   | FQ[pS]EEQQQTEDELQDK                   | 1                               | 2061.48            |
| $\beta$ 2   | FQ[pS]EEQQQTEDELQDKIHFP               | 1                               | 2556.67            |
| $\beta$ 3   | RELEELNVPGEIVE[pS]L[pS][pS][pS]EESITR | 4                               | 3122.55            |
| $\alpha$ 1  | TVDME[pS]TEVF                         | 1                               | 1237.93            |
| $\alpha$ 2  | TVDME[pS]TEVFTK                       | 1                               | 1467.47            |
| $\alpha$ 3  | TVD[Mo]E[pS]TEVFTK                    | 1                               | 1483.33            |
| $\alpha$ 4  | EQL[pS]T[pS]EENSCK                    | 2                               | 1562.22*           |
| $\alpha$ 5  | TVDME[pS]TEVFTKK                      | 1                               | 1595.41            |
| $\alpha$ 6  | VPQLEIVPN[pS]AEER                     | 1                               | 1661.17            |
| $\alpha$ 7  | YKVPQLEIVPN[pS]AEER                   | 1                               | 1832.64            |
| $\alpha$ 8  | DIG[pS]E[pS]TEDQAMETIK                | 2                               | 1927.72            |
| $\alpha$ 9  | DIG[pS]E[pS]TEDQA[Mo]EDIK             | 2                               | 1943.68            |
| $\alpha$ 10 | YKVPQLEIVPN[pS]AEER                   | 1                               | 1951.94            |
| $\alpha$ 11 | NTMEHV[pS] [pS] [pS]EESII[pS]QETYK    | 4                               | 2618.54            |
| $\alpha$ 12 | VNEL[pS]KDIG[pS]E[pS]TEDQAMEDIK       | 3                               | 2678.34            |
| $\alpha$ 13 | LRLKYYKVPQLEIVPN[pS]AEERL             | 1                               | 2704.22            |

|             |                                           |   |         |
|-------------|-------------------------------------------|---|---------|
| $\alpha$ 14 | QMEAE[pS]I[pS][pS][pS]EEIVPNPN[pS]VEQK    | 5 | 2720.96 |
| $\alpha$ 15 | Q[Mo]EAE[pS]I[pS][pS][pS]EEIVPNPN[pS]VEQK | 5 | 2737.10 |
| $\alpha$ 16 | NTMEHV[pS][pS][pS]EE[pS]SQETYKQ           | 4 | 2746.69 |
| $\alpha$ 17 | KEKVNEL[pS]KDIG[pS]E[pS]TEDQAMEDIKQ       | 3 | 2935.01 |
| $\alpha$ 18 | NANEEYYSIG[pS][pS][pS]EE[pS]AEVATEEVK     | 4 | 3008.21 |
| $\alpha$ 19 | NANEEY[pS]IG[pS][pS][pS]EE[pS]AEVATEEVK   | 5 | 3087.38 |

\*[M+Na]<sup>+</sup>

## Reference

- 1 Z. Wang, H. Guo, Y. Yu and N. He, *J. Magn. Magn. Mater.*, 2006, **302**, 397.
- 2 Y. Hou, H. Kondoh, M. Shimojo, E. O. Sako, N. Ozaki, T. Kogure and T. Ohta, *J Phys. Chem. B*, 2005, **109**, 4845.
- 3 Y. Wang, J. F. Wong, X. Teng, X. Z. Lin and H. Yang, *Nano Lett.*, 2003, **3**, 1555.
- 4 C. Yao, Y. Shin, L. Q. Wang, C. F. Windisch, W. D. Samuels, B. W. Arey, C. Wang, W. M. Risen and G. J. Exarhos, *J. Phys. Chem. C*, 2007, **111**, 15141.
- 5 M. Zheng, Y. Liu, Y. Xiao, Y. Zhu, Q. Guan, D. Yuan and J. Zhang, *J. Phys. Chem. C*, 2009, **113**, 8455.
- 6 X. Sun and Y. Li, *J. Colloid Interface Sci.*, 2005, **291**, 7.
- 7 X. Jia, D. Chen, X. Jiao and S. Zhai, *Chem. Commun.*, 2009, **8**, 968.
- 8 E. D. Obraztsova, M. Fujii, S. Hayashi, V. L. Kuznetsov, Y. V. Butenko and A. L. Chuvilin, *Carbon*, 1998, **36**, 821.
- 9 P. G. Wu, J. H. Zhu and Z. H. Xu, *Adv. Funct. Mater.*, 2004, **14**, 345.
- 10 Y. Ma, Z. Hu, L. Yu, Y. Hu, B. Yue, X. Wang and Y. Chen, *J. Phys. Chem. B*, 2006, **110**, 20118.
- 11 S. V. Pol, V. G. Pol, A. Gedanken, I. Felner, M-G Sung and S. Asai, *Inorg. Chem.*, 2007, **46**, 4951.
- 12 M. Bystrzejewski, K. Pyrzyńska, A. Huczko and H. Lange, *Carbon*, 2009, **47**, 1189.
